# Supplementary material for: Suppressed hydration in metoclopramide hydrochloride by salt cocrystallisation
Source: Royal Society of Chemistry journal article supplement (doi:10.1039/c8ce00129d), 2018-01-01
Supplement: c8ce00129d1.pdf [file c8ce00129d1.pdf]

**Electronic Supplementary Information**

**Suppressed hydration in metoclopramide hydrochloride by salt  
cocrystallisation**

Yuda Prasetya Nugraha<sup>a</sup> and Hidehiro Uekusa<sup>b</sup>

<sup>a</sup> Department of Chemistry and Materials Science, Graduate School of Science and Engineering, Tokyo Institute of Technology, 2-12-1, Ookayama, Meguro, Tokyo 152-8551, Japan

<sup>b</sup> Department of Chemistry, School of Science, Tokyo Institute of Technology, 2-12-1, Ookayama, Meguro, Tokyo 152-8551, Japan

E-mail: [uekusa@chem.titech.ac.jp](mailto:uekusa@chem.titech.ac.jp)

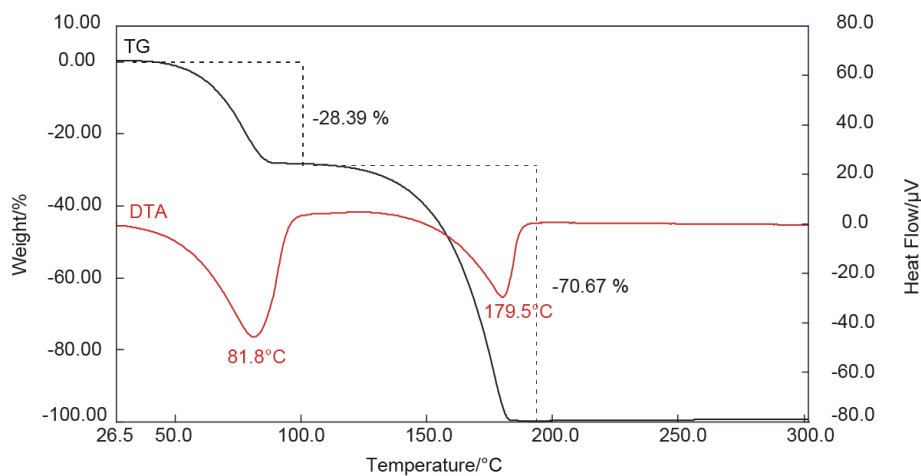

Fig. S1 TG-DTA thermogram of OXA dihydrate used in this study. TG and DTA curves are indicated by black and red lines, respectively.

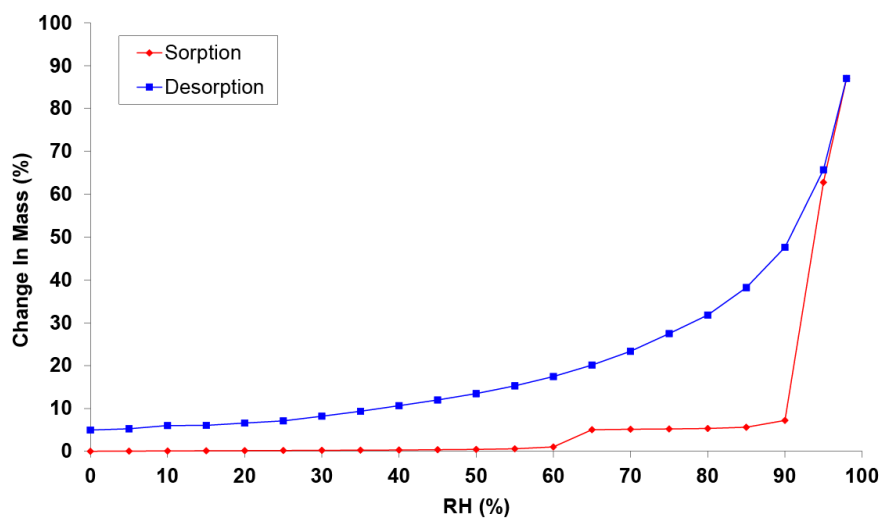

Fig. S2 Dynamic vapor sorption (DVS) measurement results of MCPHCl-Anh at 0–100% RH. The measurement was conducted at 25°C.

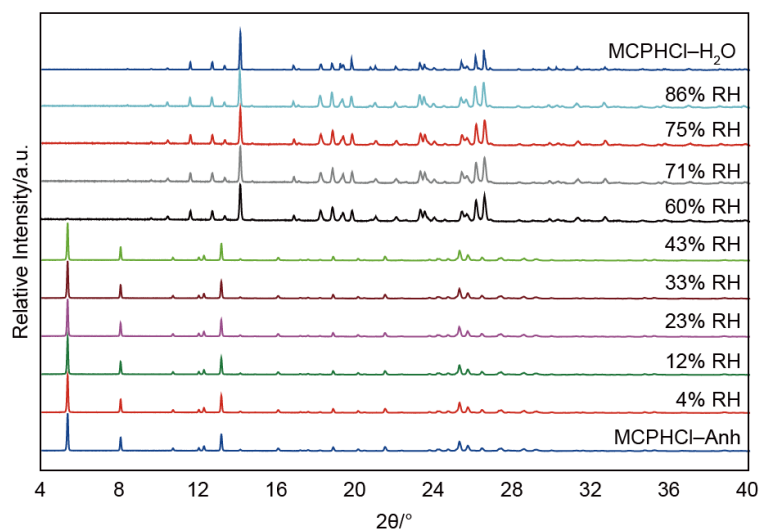

Fig. S3 PXR D pattern of MCPHCl-Anh after 2 days exposure in humidity-controlled environment at ambient temperature. Experimental PXR D pattern of MCPHCl-Anh and MCPHCl-H<sub>2</sub>O are included as reference.

Table S1 Hydrogen bond parameters in MCPHCl-H<sub>2</sub>O

| D-H...A                         | D-H (Å)   | H...A (Å) | D...A (Å)  | D-H...A (°) |
|---------------------------------|-----------|-----------|------------|-------------|
| N(1)-H(1B)...Cl(1)              | 0.841(19) | 2.684(18) | 3.0078(15) | 104.5(14)   |
| N(1)-H(1B)...O(3) <sup>1</sup>  | 0.841(19) | 2.146(19) | 2.9606(18) | 163.2(17)   |
| N(1)-H(1A)...Cl(2) <sup>2</sup> | 0.865(19) | 2.394(19) | 3.2460(15) | 168.6(16)   |
| N(2)-H(2)...O(1)                | 0.848(17) | 2.075(16) | 2.7103(15) | 131.3(14)   |
| N(3)-H(3)...Cl(2)               | 0.924(17) | 2.176(18) | 3.0785(12) | 165.1(14)   |
| O(3)-H(3B)...O(2)               | 0.79(2)   | 1.99(2)   | 2.7622(16) | 170(2)      |
| O(3)-H(3C)...Cl(2) <sup>3</sup> | 0.86(2)   | 2.35(2)   | 3.1989(14) | 169(2)      |
| C(3)-H(3A)...O(2)               | 0.95      | 2.40      | 2.7465(17) | 100.8       |
| C(9)-H(9A)...O(2)               | 0.99      | 2.33      | 2.7588(17) | 104.9       |
| C(13)-H(13B)...O(2)             | 0.99      | 2.38      | 3.3307(18) | 161.7       |

$$^1 -x + 1/2, y - 1/2, -z + 1/2$$

$$^2 -x + 1, -y, -z + 1$$

$$^3 -x, -y, -z + 1$$

Table S2 Hydrogen bond parameters in MCPHCl-Anh

| D-H...A                           | D-H (Å) | H...A (Å) | D...A (Å) | D-H...A (°) |
|-----------------------------------|---------|-----------|-----------|-------------|
| N(1)-H(1B)...Cl(1)                | 0.88    | 2.58      | 2.993(4)  | 109.7       |
| N(1)-H(1A)...O(2) <sup>1</sup>    | 0.88    | 2.03      | 2.893(5)  | 166.1       |
| N(2)-H(2)...O(1)                  | 0.88    | 1.91      | 2.622(5)  | 136.5       |
| C(3)-H(3A)...O(2)                 | 0.95    | 2.43      | 2.768(6)  | 100.4       |
| C(9)-H(9A)...O(2)                 | 0.99    | 2.40      | 2.782(6)  | 102.1       |
| N(3)-H(3)...Cl(2)                 | 1.00    | 2.13      | 3.127(5)  | 174.1       |
| C(9)-H(9B)...Cl(2)                | 0.99    | 2.82      | 3.478(5)  | 124.5       |
| C(13)-H(13B)...Cl(2) <sup>2</sup> | 0.99    | 2.81      | 3.770(7)  | 164.6       |

$$^1 x - 1/2, -y + 3/2, -z + 1$$

$$^2 -x + 1, y - 1/2, -z + 1/2$$
